# Supplementary material for: Introduction to celebrating Latin American talent in chemistry
Source: Royal Society of Chemistry journal article supplement (doi:10.1039/d1ra90175c), 2021-01-01
Supplement: d1ra90175c1.pdf [file d1ra90175c1.pdf]

## Latin America Themed Collection

Gabriel Merino,<sup>1,\*</sup> María A. Fernández-Herrera,<sup>1</sup> Galo J. A. A. Soler-Illia,<sup>2</sup> Aldo J. G. Zarbin,<sup>3</sup> and Eduardo Chamorro.<sup>4</sup>

<sup>1</sup>Departamento de Física Aplicada, Centro de Investigación y de Estudios Avanzados, Unidad Mérida. Km. 6 Antigua Carretera a Progreso, Apdo. Postal 73, Cordemex, 97310, Mérida, Yuc., México.

<sup>2</sup>Instituto de Nanosistemas, UNSAM, CONICET, Av. 25 de Mayo 1021, 1650 San Martín, Buenos Aires, Argentina.

<sup>3</sup>Departamento de Química, Universidade Federal do Paraná (UFPR), CP 19032, CEP 81531-980 Curitiba-PR, Brazil.

<sup>4</sup>Facultad de Ciencias Exactas, Departamento de Ciencias Químicas, Universidad Andres Bello, Avenida República 275, 8370146 Santiago, Chile.

E-mail: gmerino@cinvestav.mx

**Table 1-SI.** Number of publications indexed in Web of Science published in a set of RSC journals within the period 2019-2020. (Data exported: 17-Oct-2021).

| <b>Journal</b>                                  | <b>Number of publications</b> | <b>Number of publications from Latam</b> |
|-------------------------------------------------|-------------------------------|------------------------------------------|
| Analyst                                         | 1678                          | 37                                       |
| Analytical Methods                              | 1315                          | 97                                       |
| Chemical Communications                         | 6447                          | 63                                       |
| Chemical Science                                | 2743                          | 30                                       |
| Chemical Society Reviews                        | 487                           | 12                                       |
| CrystEngComm                                    | 1705                          | 43                                       |
| Dalton Transactions                             | 3757                          | 122                                      |
| Energy Environmental Science                    | 625                           | 8                                        |
| Environmental Science Nano                      | 590                           | 11                                       |
| Environmental Science Processes Impacts         | 356                           | 4                                        |
| Environmental Science Water Research Technology | 470                           | 16                                       |
| Food Function                                   | 1624                          | 78                                       |
| Green Chemistry                                 | 1446                          | 43                                       |
| Journal of Materials Chemistry A                | 5094                          | 60                                       |
| Journal of Materials Chemistry B                | 1670                          | 24                                       |
| Journal of Materials Chemistry C                | 3420                          | 40                                       |
| Materials Advances                              | 344                           | 15                                       |
| Natural Product Reports                         | 144                           | 8                                        |
| Organic Biomolecular Chemistry                  | 2186                          | 59                                       |
| Physical Chemistry Chemical Physics             | 5437                          | 296                                      |
| RSC Advances                                    | 9423                          | 293                                      |
| RSC Medicinal Chemistry                         | 120                           | 10                                       |
| Soft Matter                                     | 2013                          | 64                                       |
| Sustainable Energy Fuels                        | 917                           | 18                                       |
| <b>Total</b>                                    | <b>54011</b>                  | <b>1451</b>                              |

**Table 2-SI.** Number of publications indexed in Web of Science published in a set of RSC journals within the period 2011-2020. (Data exported: 17-Oct-2021).

| <b>Journal</b>                                  | <b>Number of publications</b> | <b>Number of publications from LatAm</b> |
|-------------------------------------------------|-------------------------------|------------------------------------------|
| Analyst                                         | 7874                          | 199                                      |
| Analytical Methods                              | 8407                          | 617                                      |
| Chemical Communications                         | 32669                         | 313                                      |
| Chemical Science                                | 8490                          | 93                                       |
| Chemical Society Reviews                        | 3369                          | 36                                       |
| CrystEngComm                                    | 10384                         | 188                                      |
| Dalton Transactions                             | 19013                         | 443                                      |
| Energy Environmental Science                    | 3651                          | 39                                       |
| Environmental Science Nano                      | 1287                          | 22                                       |
| Environmental Science Processes Impacts         | 1504                          | 40                                       |
| Environmental Science Water Research Technology | 945                           | 21                                       |
| Food Function                                   | 4318                          | 263                                      |
| Green Chemistry                                 | 5750                          | 129                                      |
| Journal of Materials Chemistry A                | 19713                         | 172                                      |
| Journal of Materials Chemistry B                | 6697                          | 104                                      |
| Journal of Materials Chemistry C                | 11349                         | 144                                      |
| Materials Advances                              | 344                           | 15                                       |
| Natural Product Reports                         | 708                           | 24                                       |
| Organic Biomolecular Chemistry                  | 11477                         | 272                                      |
| Physical Chemistry Chemical Physics             | 28370                         | 1288                                     |
| RSC Advances                                    | 61038                         | 1457                                     |
| RSC Medicinal Chemistry                         | 120                           | 10                                       |
| Soft Matter                                     | 10894                         | 270                                      |
| Sustainable Energy Fuels                        | 1397                          | 28                                       |
| <b>Total</b>                                    | <b>259768</b>                 | <b>6187</b>                              |

**Table 3-SI.** Overall research performance for publications in chemistry generated from Latin America within the period 2011-2020. Data source: Scopus (Scival). Data exported: 20 October, 2021.

| <b>Indicator</b>                    | <b>Value</b> |
|-------------------------------------|--------------|
| Scholarly output                    | 99107        |
| Citation count                      | 1379238      |
| Citations per publication           | 139          |
| <b>Publications by Subject Area</b> |              |
| General Chemistry                   | 41836        |
| Physical and Theoretical Chemistry  | 22997        |
| Organic Chemistry                   | 21000        |
| Analytical Chemistry                | 17392        |
| Spectroscopy                        | 8710         |
| Inorganic Chemistry                 | 8158         |
| Electrochemistry                    | 4945         |
| Chemistry (Miscellaneous)           | 2968         |

**Table 4-SI.** Overall research performance for publications in chemistry generated in the World within the period 2011-2020. Data source: Scopus (Scival). Data exported: 20 October, 2021.

| <b>Indicator</b>                    | <b>Value</b> |
|-------------------------------------|--------------|
| Scholarly output                    | 2492360      |
| Citation count                      | 48490177     |
| Citations per publication           | 19.5         |
| <b>Publications by Subject Area</b> |              |
| General Chemistry                   | 1143455      |
| Physical and Theoretical Chemistry  | 533534       |
| Organic Chemistry                   | 503629       |
| Analytical Chemistry                | 311986       |
| Spectroscopy                        | 188422       |
| Inorganic Chemistry                 | 222423       |
| Electrochemistry                    | 121831       |
| Chemistry (Miscellaneous)           | 47966        |

**Table 5-SI.** Number of publications in the chemistry area generated from Latin America countries within the period 2011-2020.

| <b>Latin America Country</b> | <b>Scholarly output</b> |
|------------------------------|-------------------------|
| Brazil                       | 53176                   |
| Mexico                       | 19492                   |
| Argentina                    | 12049                   |
| Chile                        | 7357                    |
| Colombia                     | 5741                    |
| Venezuela                    | 1286                    |
| Cuba                         | 1234                    |
| Uruguay                      | 1085                    |
| Ecuador                      | 973                     |
| Peru                         | 659                     |
| Puerto Rico                  | 642                     |
| Costa Rica                   | 408                     |
| Panama                       | 191                     |
| Bolivia                      | 100                     |
| Paraguay                     | 66                      |
| Dominican Republic           | 46                      |
| El Salvador                  | 33                      |
| Guatemala                    | 28                      |
| French Guiana                | 26                      |
| Honduras                     | 23                      |
| Nicaragua                    | 20                      |
| Guadeloupe                   | 12                      |
| Martinique                   | 6                       |
| Haiti                        | 4                       |

**Table 6-SI.** Benchmark multiple metrics for publications in the chemistry area from China, US, UK, Spain and Latin America within the period 2011-2020. Data source: Scopus (Scival). Data exported: 20 October, 2021.

| <b>Country</b> | <b>Scholarly output</b> | <b>Citations per publication</b> |
|----------------|-------------------------|----------------------------------|
| China          | 712738                  | 21.1                             |
| United States  | 395423                  | 29.0                             |
| United Kingdom | 108609                  | 26.9                             |
| Latin America  | 99234                   | 13.9                             |
| Spain          | 84906                   | 23.6                             |
